# Supplementary material for: Thermal Imaging Following Exercise in Working Dogs
Source: Front Vet Sci. 2021 Sep 6;8:705478. doi: 10.3389/fvets.2021.705478 (PMC8450497; doi:10.3389/fvets.2021.705478)
Supplement: Supplementary file 1 [file Table_1.XLSX]

## Sheet: Search Mean Data
Number of Dogs = 9	Search Temperature Difference: Mean (STD) in °C
Region	Week 2	Week 3	Week 5	Week 6	Week 7 (N=1)*	Week 8	Week 9	Week 10	Week 11	Week 12	Week 13	Overall
Dorsal Global	1.3847 (1.3108)	0.5 (0.6277)	0.1868 (0.8327)	0.5463 (1.0896)	-4.3611 (0)	-1.2759 (0.9163)	0.2472 (0.7714)	-2.7806 (2.3924)	-0.0806 (2.5259)	-0.7000 (2.9432)	-1.087 (1.4532)	-0.6746 (1.6617)
Trapezius	0.9236 (1.7201)	0.4790 (0.9411)	-0.1132 (0.8116)	0.4741 (1.0707)	-4.2778 (0)	-1.0648 (1.1892)	0.1713 (0.9330)	-2.6500 (2.5927)	-0.0306 (1.7717)	-0.9000 (2.6573)	-0.9204 (1.0736)	-0.719 ( 1.5420)
Pelvis	1.8444 (0.8809)	0.4327 (0.6876)	0.6208 (0.6968)	0.5741 (0.5922)	-3.4556 (0)	-1.1537 (0.7819)	0.5861 (0.6048)	-2.2139 (1.9524)	-0.1028 (2.4395)	-0.2422 (2.5987)	-0.9278 (0.7660)	-0.3671 (1.4923)
Right Longissimus	1.3417 (1.4273)	0.3568 (0.5704)	0.0500 (1.5205)	0.3722 (1.6337)	-3.3889 (0)	-1.2704 (1.0644)	0.0500 (0.9538)	-2.6444 (3.1977)	-0.2861 (2.4317)	-0.9222 (3.2533 )	-1.000 (2.1267)	-0.6674 (1.3855)
Left Longissimus	1.3056 (1.2752)	0.5216 (0.6405)	0.4368 (0.8280)	0.7352 (0.6886)	-4.5722 (0)	-1.5630 (0.8626)	0.2389 (0.6868)	-3.1667 (2.1763)	-0.0306 (2.6909)	-0.4633 (2.8013)	-1.5796 (1.1725)	-0.7398 (1.8120)
Right Lateral Global	1.4389 (0.8873)	0.6623 (0.8421)	0.0819 (0.7074)	-0.0463 (1.3889)	-1.200 (0)	-1.6167 (1.1457)	-0.1083 (0.4909)	-1.6639 (2.3610)	0.9472 (1.6774)	-0.5289 (1.9274)	0.1537 (0.5358)	-0.1709 (1.0115)
Right Latissimus	1.2778 (0.6675)	0.5259 (0.9206)	0.1458 (0.7626)	-0.0500 (1.5870)	-1.3444 (0)	-1.5981 (1.1680)	-0.1870 (0.5180)	-2.2639 (2.0703)	0.5750 (1.8660)	-0.5533 (2.2539)	-0.1167 (0.7347)	-0.3263 (1.0457)
Right Pectoralis	1.9097 (1.4721)	0.8988 (1.6327)	0.3361 (1.2298)	0.2222 (1.5737)	-1.2444 (0)	-2.0648 (1.9468)	0.1306 (1.0207)	-2.6750 (1.9210)	1.0250 (2.3767)	-0.3711 (2.6475)	-0.1019 (0.6917)	-0.1759 (1.3587)
Right Oblique	1.6459 (0.9968)	0.6895 (0.7760)	0.1021 (0.8856)	0.0870 (1.1100)	-1.4167 (0)	-1.5611 (0.9761)	0.0787 (0.5856)	-1.3056 (2.6870)	1.1444 (1.3121)	-0.3633 (1.9098)	0.1593 (0.1758)	-0.0673 (1.0380)
Right Cranial Shoulder	1.6111 (0.8118)	0.7006 (0.8118)	0.3917 (0.7569)	-0.2685 (1.3006)	-0.9556 (0)	-1.5907 (0.7612)	-0.1519 (0.6594)	-1.2028 (1.7403)	3.1083 (1.0803)	-0.2889 (1.9968)	0.3722 (0.9848)	0.1569 (1.3356)
Right Caudal Shoulder	1.7278 (0.9527)	0.5617 (1.0069)	-0.0090 (1.1957)	0.0574 (1.4146)	-2.2611 (0)	-1.4093 (1.8797)	0.3694 (0.5771)	-1.8333 (3.2134)	0.7194 (1.4967)	-0.5311 (2.3809)	0.0611 (0.4783)	-0.2315 (1.1880)
Right Quadricep	1.7167 (0.9140)	0.4889 (0.9393)	0.4194 (1.3524)	-0.3907 (1.6394)	-1.8667 (0)	-1.7815 (0.8616)	0.2056 (0.4818)	-2.4667 (3.5434)	0.4250 (1.7088)	-0.6078 (2.8357)	-0.4519 (1.0338)	-0.3918 (1.2396)
Right Hamstring	1.1889 (0.8971)	0.2191 (0.9358)	0.1472 (1.5738)	-0.0870 (1.6906)	-1.900 (0)	-1.6685 (1.8861)	-0.1889 (0.5064)	-2.1639 (3.5395)	0.3306 (2.2902)	-0.2378 (2.0658)	0 (1.2180)	-0.3964 (1.0507)
Left Lateral Global	1.0875 (1.2626)	0.3543 (0.6422)	0.2924 (0.8728)	0.9278 (0.0556)	-2.8611 (0)	-1.4463 (0.5214)	0.2139 (0.6585)	-1.7806 (1.8974)	0.8333 (0.5028)	-0.4767 (1.3867)	-0.6426 (0.6851)	-0.3180 (1.2637)
Left Latissimus	0.9167 (1.2749)	0.2574 (0.7692)	0.2507 (0.7676)	0.9278 (0.3619)	-2.9722 (0)	-1.5481 (0.6454)	0.1333 (0.8194)	-2.1278 (1.5871)	0.4528 (1.1667)	-0.5344 (1.5445)	-0.7074 (1.2573)	-0.4501 (1.2794)
Left Pectoralis	0.9375 (1.4283)	0.2525 (0.9745)	-0.1472 (1.0468)	0.6407 (0.5087)	-2.500 (0)	-2.2741 (0.7748)	-0.5593 (1.1228)	-3.7917 (0.9232)	0.0639 (1.6303)	-0.6611 (2.0401)	-0.8833 (2.0409)	-0.8111 (1.4653)
Left Oblique	1.3014 (1.2173)	0.4395 (0.5034)	0.3660 (0.8196)	1.1722 (0.1396)	-2.8111 (0)	-1.3870 (0.3486)	0.1630 (0.8139)	-1.9083 (2.6517)	0.9611 (0.4164)	-0.2900 1.6872	1.0000 (0.3080)	-0.2721 (1.3447)
Left Cranial Shoulder	1.0583 (1.2160)	0.4321 (0.9402)	0.1000 (1.0301)	0.8167 (0.0530)	-2.4722 (0)	-0.9741 (0.6277)	0.4389 (0.7744)	-1.1972 (1.5596)	1.0583 (0.7503)	-0.5011 (1.1959)	-0.3037 (0.9173)	-0.1404 (1.0917)
Left Caudal Shoulder	1.1819 (1.1134)	0.2426 (0.6849)	0.4188 (0.9168)	0.9556 (0.3563)	-2.9222 (0)	-1.2500 (0.6392)	0.1407 (0.7975)	-2.0389 (2.2077)	0.6278 (1.2021)	-0.8622 (1.7630)	-1.3093 (0.6282)	-0.4377 (1.3254)
Left Quadricep	1.3181 (0.9382)	0.2870 (0.7018)	0.3236 (0.7474)	0.6037 (0.4888)	-3.0167 (0)	-1.5111 (0.5589)	0.3130 (0.6859)	-2.4861 (3.1073)	0.0750 (2.3452)	-0.9744 (2.4357)	-2.0444 (1.6152)	-0.6466 (1.4313)
Left Hamstring	1.5903 (1.1926)	0.2463 (0.7445)	0.4944 (1.1371)	0.7426 (0.3695)	-2.6778 (0)	-1.1444 (0.3475)	-0.0796 (1.3296)	-1.7083 (2.3924)	0.4778 (1.4064)	-1.1144 (1.6270)	-1.2833 (0.6524)	-0.4051 (1.2689)
Chest	1.1958 (1.1499)	0.3241 (1.0845)	-0.1146 (0.9323)	0.0556 (0.7638)	-2.4389 (0)	-1.6814 (0.4229)	0.0287 (0.6931)	-2.800 (1.7128)	-0.1083 (1.8267)	-0.8256 (1.2244)	-0.9130 (1.5451)	-0.6616 (1.2198)
Table 4: Mean and Standard Deviation of Search Temperature Difference for all dogs across each week and over the course of the study.
*Week 7: only one dog participated in the Search activity during week 7, hence the 0°C for standard deviation. All the other dogs in the group made up for missing the Week 7 Search activity during the Week 12 makeup week.
