# Supplementary material for: Thermal Imaging Following Exercise in Working Dogs
Source: Front Vet Sci. 2021 Sep 6;8:705478. doi: 10.3389/fvets.2021.705478 (PMC8450497; doi:10.3389/fvets.2021.705478)
Supplement: Supplementary file 2 [file Table_2.XLSX]

## Sheet: Treadmill Mean Data
Number of Dogs (N) = 9	Treadmill Temperature Difference: Mean (Standard Deviation) in °C
Region	Week 2	Week 4	Week 6	Week 7	Week 8	Week 10	Week 12 (N=1)*	Week 13	Overall
Dorsal Global	0.1514 (1.7089)	-0.7465 (1.2179)	0.0111 (1.1304)	-0.3407 (0.8942)	-0.1764 (0.3725)	-0.4519 (0.9655)	0.05 (0)	-1.9278 (1.9937))	-0.4288 (0.6739)
Trapezius	0.1778 (1.7435)	-0.3 (1.1980)	0.0264 (1.2469)	-0.5056 (1.1475)	0.0903 (0.5968)	-0.713 (0.7941)	-0.2778 (0)	-1.8556 (2.0974)
Pelvis	0.6875 (1.5583)	-1.05208 (1.3176)	0.2111 (0.4860)	-0.2519 (0.4860)	-0.1412 (0.6191)	-0.2667 (0.7107)	0.5278 (0.8826)	-1.7574 (0)	-0.2554 (0.7625)
Right Longissimus	0.0111 (1.8076)	-0.8535 (1.5441)	0.0875 (1.3620)	-1.0352 (0.6864)	-0.9125 (1.4827)	-0.3815 (1.0833)	-0.7222 (0)	-1.7389 (2.2159)	-0.6931
Left Longissimus	0.2056 (1.8911)	-0.9056 (1.5289)	-0.01250 (0.9302)	0.2204 (1.4381)	-0.0806 (0.3627)	-0.6463 (1.3922)	0.0833 (0)	-2.4333 (2.4775)	-0.4461
Right Lateral Global	-0.3778 (1.3968)	-0.3326 (1.7450)	-0.0125 (0.3257)	-0.6907 (1.3661)	-0.4931 (0.4775)	-0.4019 (0.8578)	0.3111 (0)	-1.3407 (2.1294)	-0.4173 (0.4523)
Right Latissimus	-0.3167 (1.4995)	-0.4847 (1.8403)	0.1403 (0.4267)	-0.8241 (1.4171)	-0.4028 (0.2654)	-0.4741 (0.8546)	-0.2000 (0)	-1.8722 (2.2510)	-0.5543 (0.5600)
Right Pectoralis	-0.5389 (1.9985)	-0.4542 (2.4797)	0.1431 (1.1277)	-0.6519 (2.2986)	-0.7542 (0.2803)	-0.6315 (1.2588)	0.2389 (0)	-1.5019 (3.2217)	-0.5188 (0.5085)
Right Oblique	-0.2789 (1.2404)	-0.2993 (1.7476)	-0.1361 (0.4777)	-0.5519 (1.0960)	-0.5986 (0.5294)	-0.3537 (1.0505)	0.2833 (0)	-1.772 (1.7628)	-0.4634 (0.5564)
Right Cranial Shoulder	-0.4656 (1.3351)	-0.3535 (1.8515)	-0.1972 (0.1750)	-0.3148 (1.4575)	-0.7444 (0.4598)	-0.5611 (0.9583)	0.7222 (0)	-0.6870 (1.7488)	-0.3252 (0.4325)
Right Caudal Shoulder	-0.4000 (1.1860)	-0.2257 (1.5771)	-0.0361 (0.3122)	-0.5241 (1.1543)	-0.6361 (0.3181)	-0.5389 (1.0724)	0.8944 (0)	-1.2796 (1.7527)	-0.3433 (0.5785)
Right Quadricep	-0.5667 (1.6441)	-0.3007 (1.8105)	0.1847 (0.8701)	-0.9333 (1.7381)	-0.5667 (0.4709)	-0.2889 (1.3767)	0.8056 (0)	-2.4926 (2.5709)	-0.5198 (0.8959)
Right Hamstring	-0.6111 (1.0308)	-0.4708 (1.7607)	0.3125 (0.4930)	-0.2537 (1.3563)	-0.2403 (0.6376)	-0.8481 (1.1324)	-0.3222 (0)	-0.3130 (2.5580)	-0.3433 (0.3148)
Left Lateral Global	0.1344 (1.0308)	-0.5306 (1.3058)	-0.0139 (0.8491)	0.6611 (1.0648)	0.1500 (0.6669)	-0.5815 (1.5448)	-0.4167 (0)	-1.544 (1.4720)	-0.2677 (0.6208)
Left Latissimus	0.0767 (1.0433)	-0.6132 (1.3423)	-0.0722 ( 0.9704)	0.5241 (1.0249)	0.0528 (0.4291)	-0.6389 (1.5696)	-0.2333 (0)	-1.6333 (1.5025)	-0.3172 (0.6114)
Left Pectoralis	-0.0322 (1.1620)	-0.5931 (1.7959)	0.0347 (1.5371)	-0.0500 (0.9719)	0.1111 (1.0361)	-0.8167 (2.3342)	-0.2278 (0)	-2.2167 (1.7622)	-0.4738 (0.7250)
Left Oblique	0.3756 (1.0974)	-0.5493 (1.3939)	0.0014 (0.9160)	0.4593 (0.9959)	0.1944 (0.7072)	-0.5759 (1.5392)	-0.8444 (0)	-1.4463 (1.4333)	-0.2982 (0.6242)
Left Cranial Shoulder	-0.0144 (0.9610)	-1.050 (1.6820)	0.0833 (0.9421)	0.3481 (1.2161)	0.2542 (0.8453)	-0.2278 (1.0476)	-0.0111 (0)	-1.281 (1.8588)	-0.2374 (0.5633)
Left Caudal Shoulder	0.1433 (1.0776)	-0.5861 (1.6872)	0.2028 (1.2107)	0.6315 (1.0887)	0.2486 (0.8567)	-0.2704 (1.7709)	-0.1722 (0)	-1.9481 (1.5813)	-0.2188 (0.7400)
Left Quadricep	0.2067 (1.0296)	-0.5090 (2.1920)	0.2764 (1.5486)	0.2296 (1.2100)	0.1653 (0.3837)	-0.7000 (1.5834)	-0.3390 (0)	-1.8556 (1.6867)	-0.3157 (0.6809)
Left Hamstring	0.1033 (1.1253)	-0.7326 (1.8991)	0.6403 (1.4185)	1.1833 (2.1247)	0.2861 (1.1841)	-0.4056 (1.1852)	-0.6667 (0)	-1.7611 (2.4781)	-0.1691 (0.8603)
Chest	-0.5044 (1.2311)	-0.5229 (1.9499)	-0.1958 (0.5901)	0.0685 (1.5280)	-0.3236 (0.3775)	-0.1037 (1.1147)	-0.8667 (0)	-1.1593 (1.9816)	-0.451 (0.3799)
Table 3: Mean and Standard Deviation of Treadmill Temperature Difference for all dogs across each week and over the course of the study.
*Week 12 was the makeup week for the study to gather any missing data, only 1 dog participated in treadmill on week 12, hence the standard deviation of 0 °C
